# Supplementary material for: Bacterial Hyaluronidase Promotes Ascending GBS Infection and Preterm Birth
Source: PubMed Central journal article supplement (PMC4937215; doi:10.1128/mbio.00781-16), 2016-06-28

Figure S4

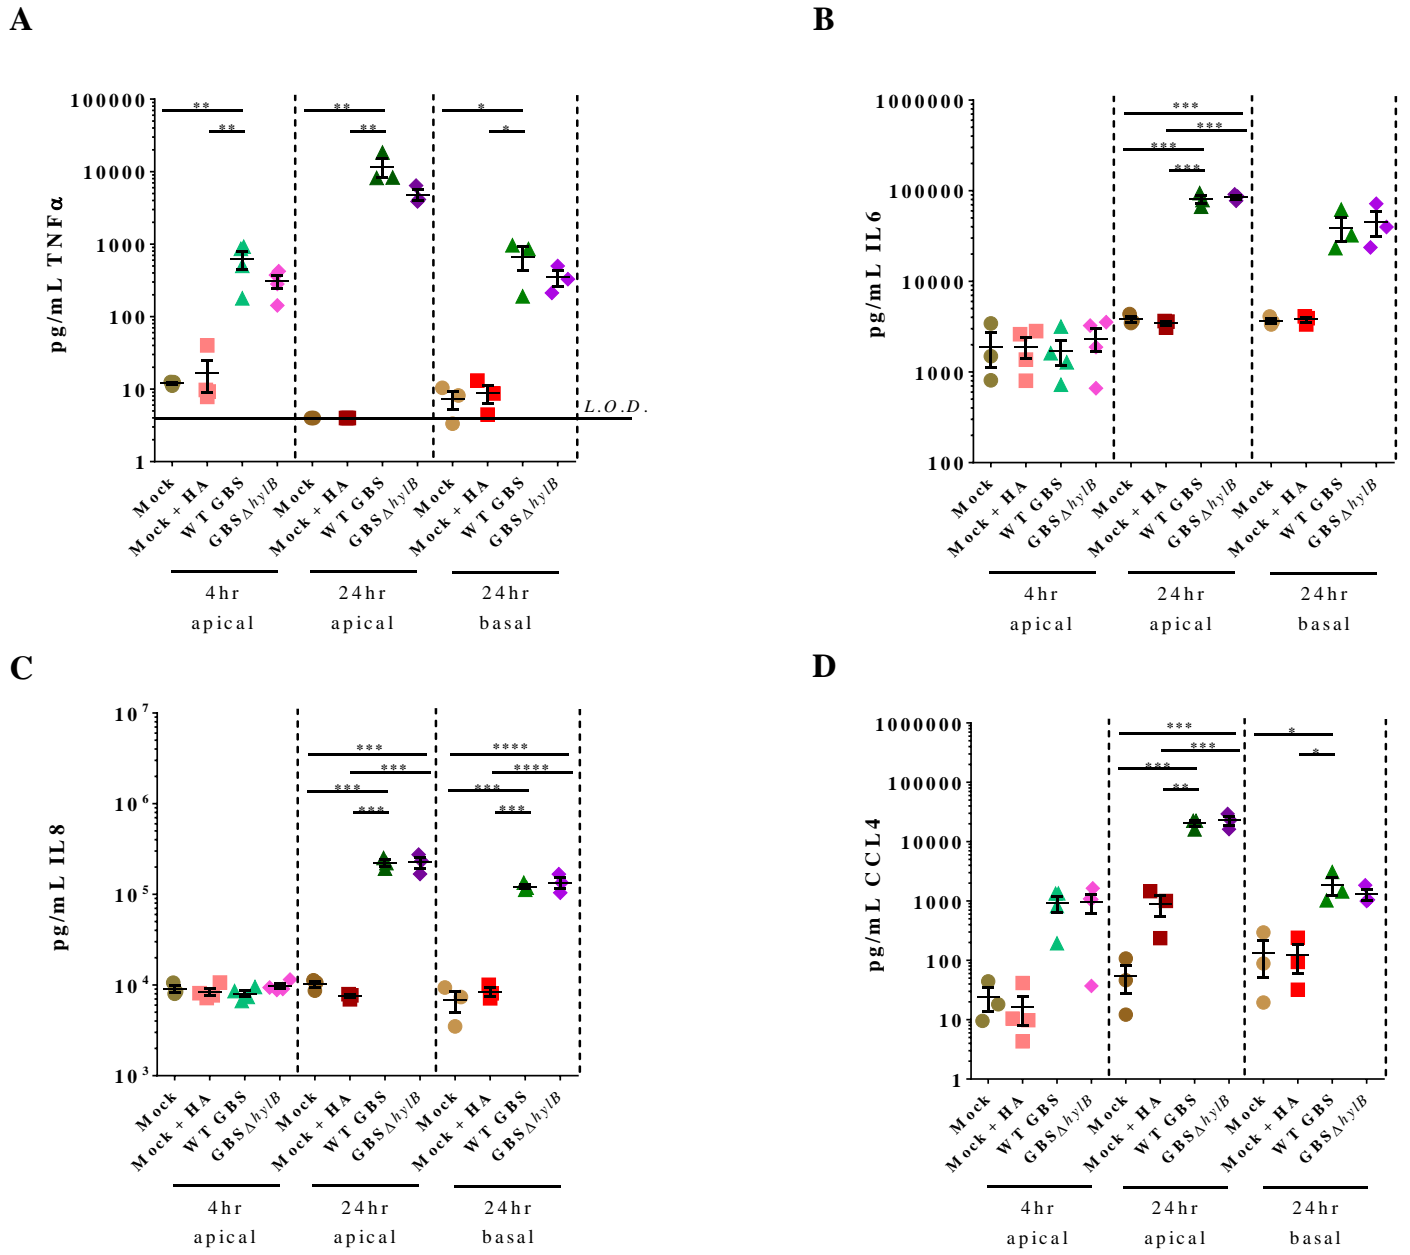

Supplement: mbo003162877sf4.pdf [file mbo003162877sf4.pdf]
